# Supplementary material for: Sustainable plasma-catalytic bubbles for hydrogen peroxide synthesis
Source: Royal Society of Chemistry journal article supplement (doi:10.1039/d1gc00198a), 2021-01-01
Supplement: d1gc00198a1.pdf [file d1gc00198a1.pdf]

## Supporting Information

### Sustainable plasma-catalytic bubbles for hydrogen peroxide synthesis

Renwu Zhou,<sup>a#\*</sup> Tianqi Zhang,<sup>a#</sup> Rusen Zhou,<sup>a,b\*</sup> Sen Wang,<sup>c</sup> Danhua Mei,<sup>c</sup> Anne Mai-Prochnow,<sup>a</sup> Janith Weerasinghe,<sup>b</sup> Zhi Fang,<sup>c</sup> Kostya (Ken) Ostrikov,<sup>b</sup> and Patrick J Cullen<sup>a</sup>

<sup>a</sup> Australia. School of Chemical and Biomolecular Engineering, The University of Sydney, NSW 2006, Australia

<sup>b</sup> School of Chemistry and Physics, Center for Materials Science, Queensland University of Technology, Brisbane, QLD 4000, Australia

<sup>c</sup> College of Electrical Engineering and Control Science, Nanjing Tech University, Nanjing 210009, China

# Renwu Zhou and Tianqi Zhang contributed equally to this work.

\*Corresponding author: [renwu.zhou@sydney.edu.au](mailto:renwu.zhou@sydney.edu.au) and [zhourusen2008@gmail.com](mailto:zhourusen2008@gmail.com)

**Table S1.** Observed OES data of the argon emission spectral lines. Transition, initial energy levels ( $E_i$ ) and final energy levels ( $E_f$ ) taken from Ref [S1].

| Wavelength (nm) | Transition              | Relative intensity (a.u) |       | $E_i$ (eV) | $E_f$ (eV) |
|-----------------|-------------------------|--------------------------|-------|------------|------------|
|                 |                         | Glow                     | Spark |            |            |
| 696             | $2p_2 \rightarrow 1s_5$ | 10272                    | 21766 | 13.33      | 11.55      |
| 707             | $2p_3 \rightarrow 1s_5$ | 1253                     | 7310  | 13.30      | 11.55      |
| 715             | $2p_5 \rightarrow 1s_5$ | 293                      | 882   | 13.28      | 11.55      |
| 727             | $2p_2 \rightarrow 1s_4$ | 2213                     | 4510  | 13.33      | 11.62      |
| 738             | $2p_3 \rightarrow 1s_4$ | 2126                     | 12921 | 13.30      | 11.62      |
| 750             | $2p_1 \rightarrow 1s_2$ | 3598                     | 13356 | 13.48      | 11.83      |
| 751             | $2p_5 \rightarrow 1s_4$ | 2732                     | 12397 | 13.27      | 11.62      |
| 763             | $2p_6 \rightarrow 1s_5$ | 21579                    | 32181 | 13.17      | 11.55      |
| 772             | $2p_2 \rightarrow 1s_3$ | 12848                    | 31266 | 13.15      | 11.55      |
| 795             | $2p_4 \rightarrow 1s_3$ | 3368                     | 15110 | 13.28      | 11.72      |
| 801             | $2p_6 \rightarrow 1s_4$ | 2761                     | 14587 | 13.09      | 11.55      |
| 810             | $2p_7 \rightarrow 1s_4$ | 9053                     | 32879 | 13.15      | 11.62      |
| 811             | $2p_9 \rightarrow 1s_5$ | 3194                     | 22376 | 13.08      | 11.55      |
| 826             | $2p_2 \rightarrow 1s_2$ | 5777                     | 14892 | 13.33      | 11.83      |
| 841             | $2p_3 \rightarrow 1s_2$ | 4211                     | 14413 | 13.30      | 11.83      |
| 842             | $2p_8 \rightarrow 1s_4$ | 1772                     | 21505 | 13.09      | 11.62      |
| 852             | $2p_4 \rightarrow 1s_2$ | 935                      | 5872  | 13.28      | 11.83      |
| 866             | $2p_2 \rightarrow 1s_5$ | 207                      | 1405  | 13.33      | 11.55      |

**Table S2.** Chemical reactions involved in our argon plasma bubble system mainly referred to or partly adapted from Refs.

|                              | Reaction                                                                                                     | Reaction rate coefficient                                                                     | Reference |
|------------------------------|--------------------------------------------------------------------------------------------------------------|-----------------------------------------------------------------------------------------------|-----------|
| <b>Gas-phase reaction</b>    |                                                                                                              |                                                                                               |           |
| 1                            | $\text{Ar} + \text{e}^- \rightarrow \text{Ar} + \text{e}^-$                                                  | $2.336 \times 10^{-14} \times T_e^{1.609} \times \exp(0.0618(\ln T_e)^2 - 0.1171(\ln T_e)^3)$ | S2        |
| 2                            | $\text{Ar} + \text{e}^- \rightarrow \text{Ar}^* + \text{e}^-$                                                | $5 \times 10^{-15} \exp(-12.64/T_e)$                                                          | S2        |
| 3                            | $\text{Ar} + \text{e}^- \rightarrow \text{Ar}^+ + 2\text{e}^-$                                               | $2.3 \times 10^{-14} T_e^{0.59} \exp(-17.44/T_e)$                                             | S2        |
| 4                            | $\text{Ar}^* + \text{e}^- \rightarrow \text{Ar}^+ + 2\text{e}^-$                                             | $6.8 \times 10^{-15} T_e^{0.67} \exp(-4.2/T_e)$                                               | S2        |
| 5                            | $\text{Ar}^* + \text{Ar}^* \rightarrow \text{Ar}^+ + \text{Ar} + \text{e}^-$                                 | $6.4 \times 10^{-16}$                                                                         | S2        |
| 6                            | $\text{Ar}^* + \text{e}^- \rightarrow \text{Ar} + \text{e}^-$                                                | $0.5 \times 10^{-15} \exp(-1.09/T_e)$                                                         | S2        |
| 7                            | $\text{Ar}^* + \text{Ar} \rightarrow \text{Ar} + \text{Ar}$                                                  | $7.39 \times 10^{-21}$                                                                        | S2        |
| 8                            | $\text{H}_2\text{O} + \text{e}^- \rightarrow \text{H}_2\text{O} + \text{e}^-$                                | $6.0 \times 10^{-13}$                                                                         | S2        |
| 9                            | $\text{H}_2\text{O} + \text{e}^- \rightarrow \text{H}_2\text{O}^+ + 2\text{e}^-$                             | $9.028 \times 10^{-17} T_e^{2.329} \exp(-11.27/T_e)$                                          | S2        |
| 10                           | $\text{H}_2\text{O} + \text{e}^- \rightarrow \cdot\text{OH} + \cdot\text{H} + \text{e}^-$                    | $5.526 \times 10^{-14} T_e^{-0.343} \exp(-14.06/T_e)$                                         | S2        |
| 11                           | $\text{H}_2\text{O} + \text{e}^- \rightarrow \cdot\text{OH} + \text{H}^-$                                    | $2.53 \times 10^{-15} T_e^{-1.199} \exp(-6.12/T_e)$                                           | S2        |
| 12                           | $\text{Ar}^* + \text{H}_2\text{O} \rightarrow \text{Ar} + \cdot\text{OH} + \cdot\text{H}$                    | $4.5 \times 10^{-10}$                                                                         | S2        |
| 13                           | $\cdot\text{OH} + \cdot\text{OH} \rightarrow \text{H}_2\text{O}_2$                                           | $1.78 \times 10^{-11}$                                                                        | S3        |
| 14                           | $\cdot\text{OH} + \text{HO}_2 \rightarrow \text{H}_2\text{O} + \text{O}_2$                                   | $4.38 \times 10^{-17} \exp(110.9/T_g)$                                                        | S3        |
| 15                           | $\cdot\text{OH} + \text{H}_2\text{O}_2 \rightarrow \text{H}_2\text{O} + \cdot\text{HO}_2$                    | $4.53 \times 10^{-18} \exp(-288.9/T_g)$                                                       | S3        |
| <b>Liquid-phase reaction</b> |                                                                                                              | <b>Reaction constant (<math>\text{M}^{-1} \text{s}^{-1}</math>)</b>                           |           |
| 16                           | $\text{e}_{\text{gas}} + \text{H}_2\text{O} \rightarrow \text{e}_{\text{aq}} + \text{H}_2\text{O}$           | $2 \times 10^9$                                                                               | S3        |
| 17                           | $\cdot\text{OH}_{\text{g}} + \text{H}_2\text{O} \rightarrow \cdot\text{OH}_{\text{aq}} + \text{H}_2\text{O}$ | $3 \times 10^6$                                                                               | S3        |
| 18                           | $\cdot\text{OH}_{\text{aq}} + \cdot\text{OH}_{\text{aq}} \rightarrow \text{H}_2\text{O}_{2\text{aq}}$        | $5 \times 10^9$                                                                               | S4        |
| 19                           | $\text{e}_{\text{aq}} + \text{H}_2\text{O}^+ \rightarrow \cdot\text{H} + \cdot\text{OH}$                     | $6 \times 10^{11}$                                                                            | S3        |
| 20                           | $\text{e}_{\text{aq}} + \text{H}_2\text{O} \rightarrow \cdot\text{H} + \text{OH}^-$                          | $1.9 \times 10^1$                                                                             | S3        |
| 21                           | $\text{e}_{\text{aq}} + \text{e}_{\text{aq}} + 2\text{H}_2\text{O} \rightarrow \text{H}_2 + 2\text{OH}^-$    | $1.0 \times 10^8 \text{M}^{-3}\text{s}^{-1}$                                                  | S3        |
| 22                           | $\cdot\text{OH}_{\text{aq}} + \cdot\text{HO}_2 \rightarrow \text{H}_2\text{O} + \text{O}_2$                  | $7 \times 10^9$                                                                               | S4        |
| 23                           | $\cdot\text{OH}_{\text{aq}} + \text{H}_2\text{O}_2 \rightarrow \cdot\text{HO}_2 + \text{H}_2\text{O}$        | $2.7 \times 10^7$                                                                             | S4        |
| 24                           | $\cdot\text{OH}_{\text{aq}} + \cdot\text{H} \rightarrow \text{H}_2\text{O}$                                  | $7 \times 10^9$                                                                               | S4        |
| 25                           | $\cdot\text{HO}_2 + \cdot\text{HO}_2 \rightarrow \text{H}_2\text{O}_2 + \text{O}_2$                          | $8.6 \times 10^5$                                                                             | S4        |
| 27                           | $\cdot\text{HO}_2 + \text{H}_2\text{O}_2 \rightarrow \cdot\text{OH} + \text{O}_2 + \text{H}_2\text{O}$       | 0.5                                                                                           | S4        |
| 28                           | $\text{H}_2\text{O}_2 \leftrightarrow \text{HO}_2^- + \text{H}^+$                                            | N/A                                                                                           |           |
| <b>Photo reactions</b>       |                                                                                                              | <b>Reaction constant (<math>\text{cm}^2</math>)</b>                                           |           |
| 29                           | $h\nu + \text{H}_2\text{O} \rightarrow \text{H}_3\text{O}^+ + \text{e}_{\text{aq}}$                          | $1 \times 10^{-20}$                                                                           | S3        |
| 30                           | $h\nu + \text{H}_2\text{O} \rightarrow \cdot\text{H} + \cdot\text{OH}$                                       | $1 \times 10^{-20}$                                                                           | S3        |

**Table S3.** Electrical parameters of plasma reactors (c).

| Reactors | Voltage amplitude (kV) | Current amplitude (A) | Power (W) |
|----------|------------------------|-----------------------|-----------|
| SRGD     | 6.34                   | 0.25                  | 18.00     |
| SRSD     | 6.25                   | 0.26                  | 18.11     |
| SRGSD    | 6.10                   | 0.33                  | 18.25     |
| DRGSD    | 5.19                   | 0.38                  | 18.25     |

**Table S4.** Comparison of catalysts employed in plasma-catalysis system for H<sub>2</sub>O<sub>2</sub> production.

| Techniques                                                                                 | Operating Conditions                                                                | H <sub>2</sub> O <sub>2</sub> production rate (mg h <sup>-1</sup> )                 | Energy Efficiency (g kWh <sup>-1</sup> )                                         | Ref.      |
|--------------------------------------------------------------------------------------------|-------------------------------------------------------------------------------------|-------------------------------------------------------------------------------------|----------------------------------------------------------------------------------|-----------|
| Pulsed discharge + TiO <sub>2</sub> nanotubes                                              | Applied voltage: 20 kV;<br>Repetition rate: 100 Hz;<br>Ambient air                  | 1.6                                                                                 | 1.1                                                                              | [S1]      |
| Dielectric barrier discharge + persulfate                                                  | Applied voltage: 17 kV;<br>Discharge power: 3.3 (Air plasma) and 5.8 W (Ar plasma); | 0.4 (Air plasma)<br>2.3 (Ar plasma)                                                 | 0.12 (Air plasma);<br>0.39 (Ar plasma)                                           | [S2]      |
| Dielectric barrier discharge + Bi <sub>2</sub> WO <sub>6</sub> - $\gamma$ MoS <sub>2</sub> | Applied voltage: 9 kV;<br>Ambient air                                               | 2.6                                                                                 | --                                                                               | [S3]      |
| Gas surface discharge plasma + persulfate                                                  | Applied voltage: 7 kV;<br>Repetition rate: 6 kHz ;<br>Air flow rate: 1.0 L/min      | 27.0                                                                                | --                                                                               | [S4]      |
| Pulsed discharge + Graphene-TiO <sub>2</sub> nanocomposite                                 | Applied voltage: 18 kV;<br>Repetition rate: 50 Hz ;<br>Air flow rate: 4 L/min       | 5.9                                                                                 | 0.65                                                                             | [S5]      |
| Pulsed discharge + TiO <sub>2</sub> /WO <sub>3</sub> nanocomposite                         | Applied voltage: 18 kV;<br>Repetition rate: 50 Hz ;<br>Air flow rate: 4 L/min       | 5.6                                                                                 | 0.62                                                                             | [S6]      |
| Underwater plasma bubbles + 2D-TiO <sub>2</sub> /g-C <sub>3</sub> N <sub>4</sub>           | Discharge power: 18 W;<br>Ar flow rate: 1 L/min                                     | 76.5 (DRGSD)<br>164.6 (DRGSD+2D-TiO <sub>2</sub> /g-C <sub>3</sub> N <sub>4</sub> ) | 4.2 (DRGSD)<br>9.0 (DRGSD+2D-TiO <sub>2</sub> /g-C <sub>3</sub> N <sub>4</sub> ) | This work |

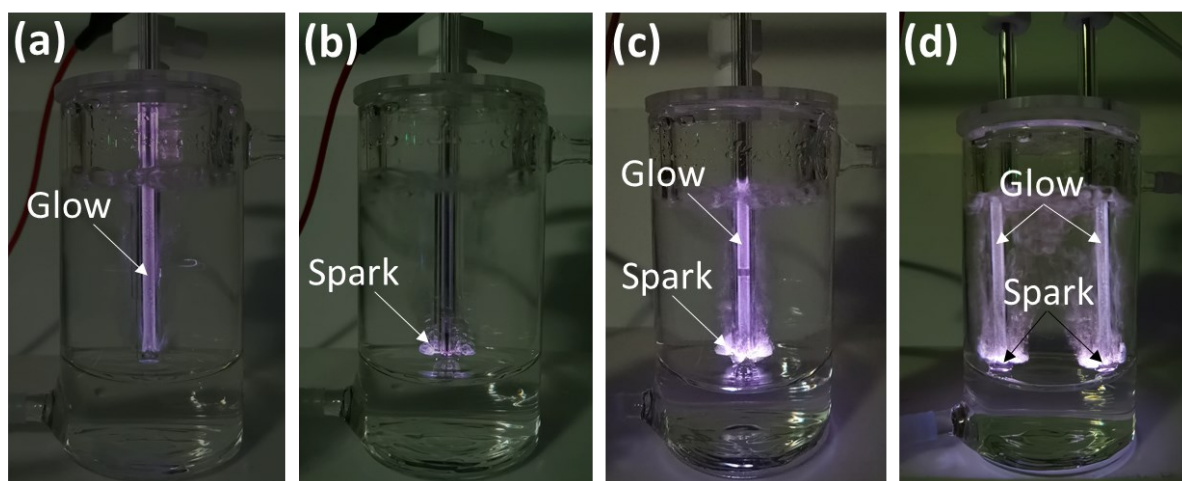

**Fig. S1** Photographs of plasma bubble column reactors design configurations: (a) single reactor glow discharge (SRGD); (b) single reactor spark discharge (SRSD); (c) single reactor glow and spark discharge (SRGSD); (d) double reactor glow and spark discharge (DRGSD).

To achieve the SRGD, the high voltage electrode was sheathed with the sealed quartz tubes. The latter incorporated an unsealed quartz tubes to induce a spark extending longitudinally towards the bubbles. Meanwhile, combinative discharge schemes were achieved in the SRGSD reactor with a bare electrode. In the configuration involving the single reactor, the circuit was completed by connecting the negative tungsten rod immersed in water, while for the double reactors, the second reactor was connected to the negative terminal.

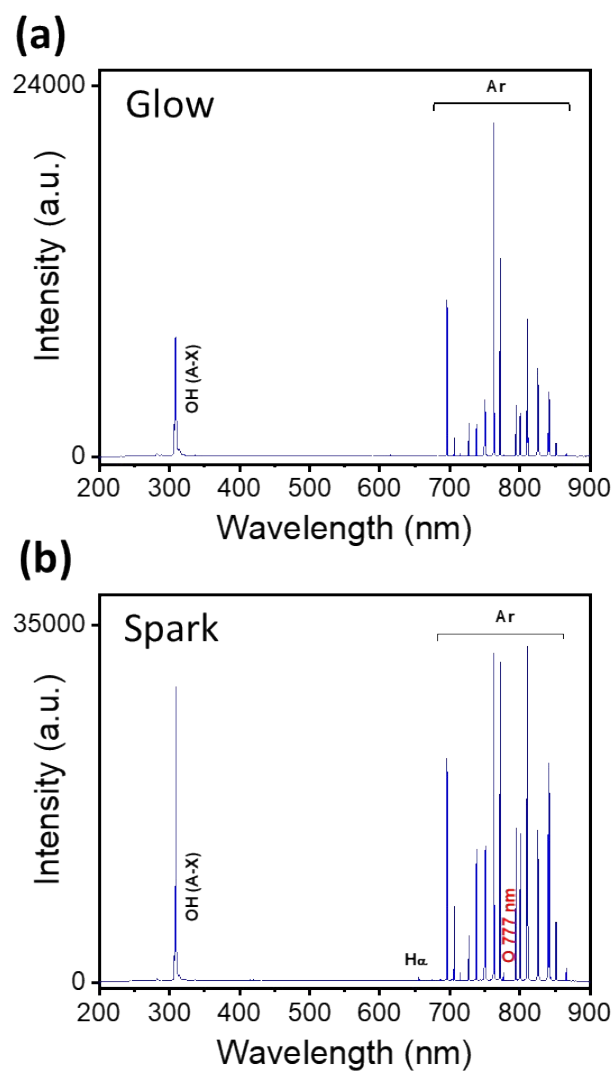

**Fig. S2** Optical Emission Spectra (OES) measurements representing (a) the glow discharge and (b) spark discharge.

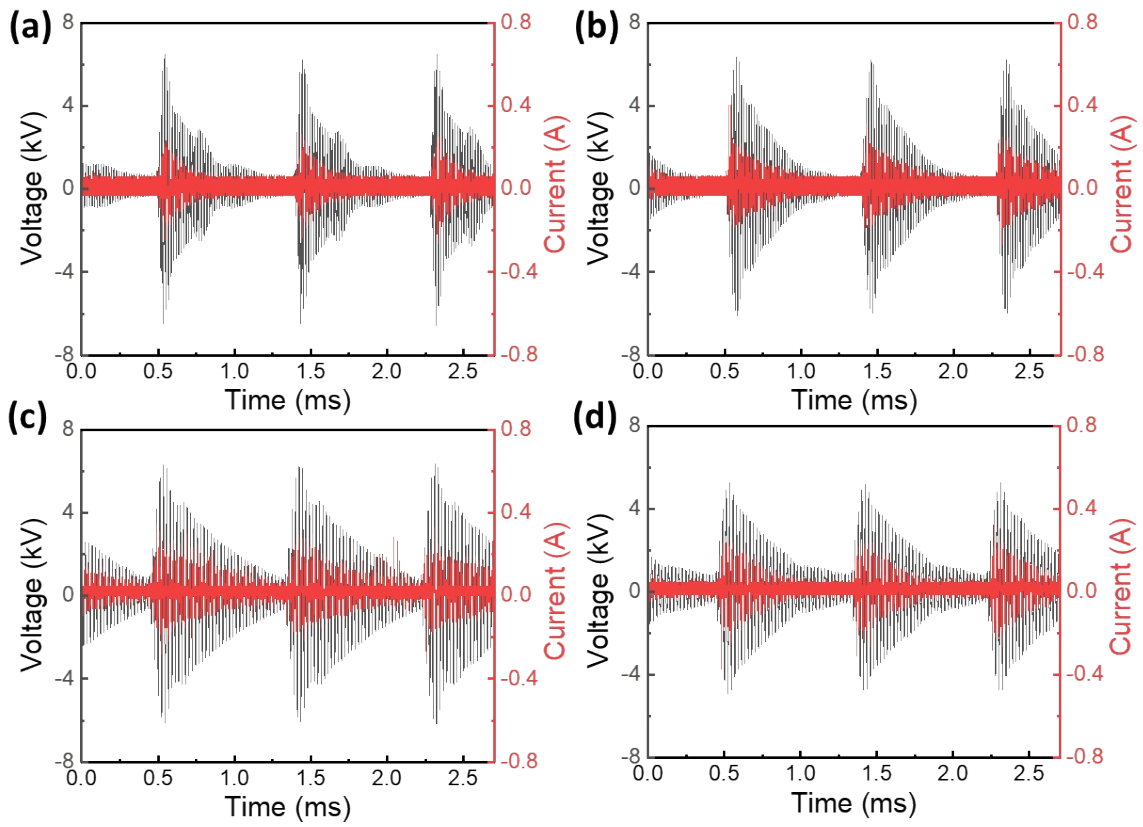

**Fig. S3** Electrical diagnostic data for (a) single reactor glow discharge (SRGD); (b) single reactor spark discharge (SRS); (c) single reactor glow and spark discharge (SRGSD); (d) double reactor glow and spark discharge (DRGSD).

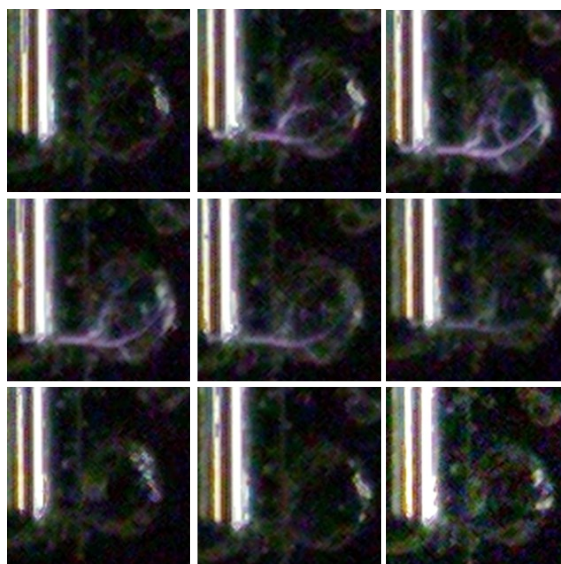

**Fig. S4** Dynamic process of plasma discharge propagation in bubbles over one cycle.

To further understand the transformation of the electrical power, the behaviors of the bubbles were recorded by an ultra-speed camera (Nova S16, with the frame rate set at 66 K fps) in a free run mode. As shown in Fig. S4, the discharge was initially initiated at the electrode-side of the bubble where the electric field enhancement is prevalent, and subsequently, the streamer propagated along the surface of the bubbles. The streamer channel expanded to a maximum size before beginning to shrink. Finally, fine bubbles formed, delivering the species into the aqueous solution.



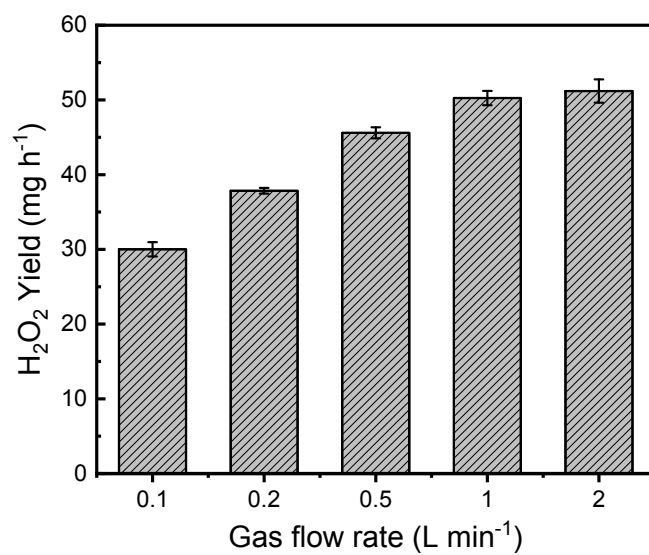

**Fig. S5** The effect of gas flow rate on H<sub>2</sub>O<sub>2</sub> production using SRGSD (8 holes, 18 W and dry feeding gas).

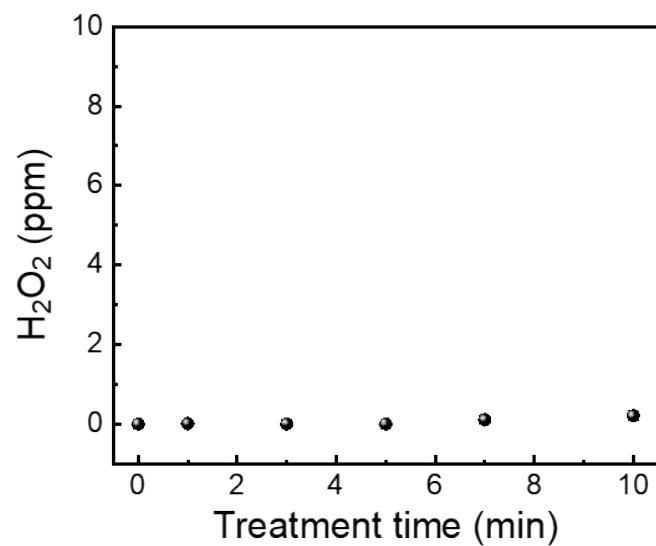

**Fig. S6** Concentration of H<sub>2</sub>O<sub>2(aq)</sub> produced by the plasma-induced photolysis of water as a function of the treatment time. In order to only treat the solutions with plasma-produced UV irradiation, other plasma species are excluded by using a plasma column without any microholes.

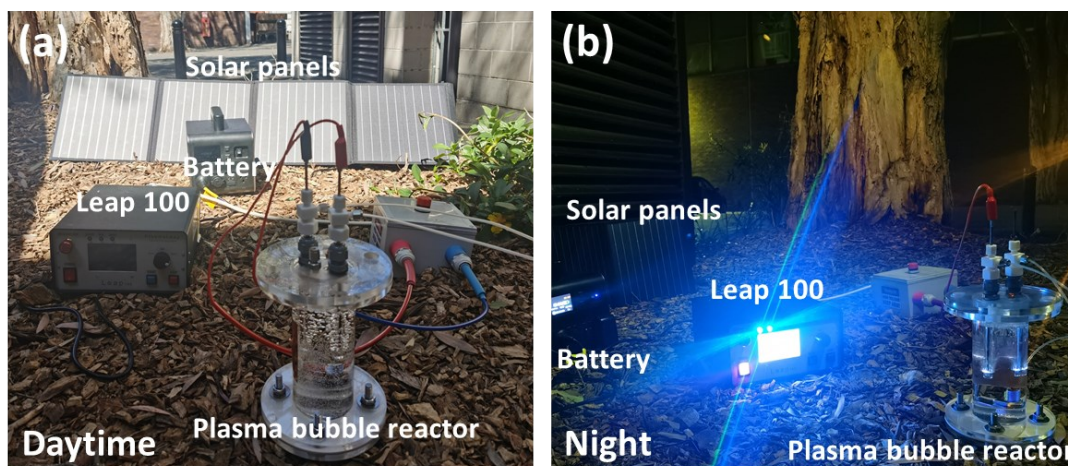

**Fig. S7** Photos of solar-powered plasma bubble reactor system taken at daytime and night.

## Reference

- [S1] A. Kramida, Y. Ralchenko and J. Reader, NIST Atomic Spectra Database (ver. 5.2). (National Institute of Standards and Technology, Gaithersburg, MD, 2015). (Available at: <http://physics.nist.gov/asd>, date last accessed April 28, 2015).
- [S2] D. Liu, B. Sun, F. Iza, D. Xu, X. Wang, M. Rong, M. Kong, *Plasma Sources Science and Technology*, 2017, **26**, 045009.
- [S3] W. Tian, M. J. Kushner, *Journal of Physics D: Applied Physics*, 2014, **47**, 165201.W.
- [S4] Z. C. Liu, D. X. Liu, C. Chen, D. Li, A. J. Yang, M. Z. Rong, H. L. Chen, M. G. Kong, *Journal of Physics D: Applied Physics*, 2015, **48**, 495201.
- [S5] Y. Zhang, Q. Xin, Y. Cong, Q. Wang and B. Jiang, *Chemical Engineering Journal*, 2013, **215**, 261-268.
- [S6] K. Shang, X. Wang, J. Li, H. Wang, N. Lu, N. Jiang and Y. Wu, *Chemical Engineering Journal*, 2017, **311**, 378-384.
- [S7] K. Zheng, Y. Sun, S. Gong, G. Jiang, X. Zheng and Z. Yu, *Chemosphere*, 2019, **222**, 872-883.
- [S8] S. Tang, D. Yuan, Y. Rao, N. Li, J. Qi, T. Cheng, Z. Sun, J. Gu and H. Huang, *Chemical Engineering Journal*, 2018, **337**, 446-454.
- [S9] H. Guo, N. Jiang, H. Wang, K. Shang, N. Lu, J. Li and Y. Wu, *Applied Catalysis B: Environmental*, 2019, **248**, 552-566.
- [S10] H. Guo, N. Jiang, H. Wang, N. Lu, K. Shang, J. Li and Y. Wu, *Journal of hazardous materials*, 2019, **371**, 666-676.
